# Supplementary material
Source: PubMed Central journal article supplement (PMC4438448)
Supplement: supp_eru486_jexbot132654_file002.pdf [file supp_eru486_jexbot132654_file002.pdf]

**Differential gene expression and alternative splicing between diploid and tetraploid watermelon.** *T Saminathan, P Nimmakayala, S Manohar, S Malkaram, A Almeida, R Cantrell, Y Tomason, L Abbur, MA Rahman, VG Vajja, A Khachane, B Kumar, HK Rajasimha, A Levi, T Wehner, and UK Reddy*

**SUPPLEMENTARY DATA**

Supplementary Table S4. List of top 20 genes upregulated in tetraploid compared to Sugar Baby diploid.

| Fold change (log2) | p_value  | ICuGI Ref. ID     | Gene name                                               |
|--------------------|----------|-------------------|---------------------------------------------------------|
| 10.2012            | 2.83E-12 | <i>Cl</i> a018600 | Chlorophyll A-B binding protein                         |
| 8.63253            | 2.52E-05 | <i>Cl</i> a001931 | MLP-like protein 28                                     |
| 8.21858            | 1.41E-10 | <i>Cl</i> a017463 | MYB transcription factor                                |
| 8.18404            | 1.51E-14 | <i>Cl</i> a022611 | Gibberellin-regulated family protein                    |
| 8.05051            | 1.73E-09 | <i>Cl</i> a005776 | Cellulose synthase 3                                    |
| 7.96636            | 0.005667 | <i>Cl</i> a009350 | Membrane transporter D1                                 |
| 7.82779            | 0        | <i>Cl</i> a019105 | Chlorophyll a-b binding protein P4, chloroplastic       |
| 7.5895             | 2.99E-07 | <i>Cl</i> a007294 | Chalcone isomerase-like protein                         |
| 7.08381            | 0.002006 | <i>Cl</i> a021048 | Peroxidase 46                                           |
| 6.98685            | 3.77E-15 | <i>Cl</i> a001440 | Phloem filament protein; PP1                            |
| 6.87715            | 6.66E-16 | <i>Cl</i> a012670 | Photosystem I reaction center subunit VI, chloroplastic |
| 6.8493             | 7.32E-05 | <i>Cl</i> a015457 | Peroxyureidoacrylate/ureidoacrylate amidohydrolase RutB |
| 6.76786            | 1.74E-11 | <i>Cl</i> a022418 | Tubulin beta-1 chain                                    |
| 6.67217            | 4.58E-10 | <i>Cl</i> a014313 | Peroxidase                                              |
| 6.66647            | 3.11E-15 | <i>Cl</i> a004746 | Chlorophyll a-b binding protein 6A, chloroplastic       |
| 6.65144            | 2.53E-10 | <i>Cl</i> a020143 | Patatin-like protein 3                                  |
| 6.63136            | 6.13E-10 | <i>Cl</i> a002155 | Pollen Ole e 1 allergen and extensin family protein     |
| 6.47261            | 5.79E-07 | <i>Cl</i> a018935 | Uncharacterized GPI-anchored protein                    |
| 6.46172            | 0.005806 | <i>Cl</i> a005431 | Amine oxidase family protein                            |
| 6.43315            | 1.26E-10 | <i>Cl</i> a016148 | Two-component response regulator ARR11; SHAQKYF class   |

Supplementary Table S5. List of top 20 genes downregulated in tetraploid compared to Sugar Baby diploid.

| Fold change (log2) | <i>p</i> _value | ICuGI Ref. ID    | Gene name                                        |
|--------------------|-----------------|------------------|--------------------------------------------------|
| -11.6429           | 1.50E-07        | <i>Cla004097</i> | Nucleoside phosphorylase                         |
| -10.2893           | 3.11E-07        | <i>Cla022835</i> | Choline dehydrogenase                            |
| -10.1997           | 0               | <i>Cla006009</i> | Proteinase inhibitor I                           |
| -9.19615           | 0               | <i>Cla019802</i> | Pathogenesis-related protein 4B                  |
| -9.0058            | 0               | <i>Cla019124</i> | ABC transporter ATP-binding protein              |
| -8.68444           | 0               | <i>Cla004673</i> | CASP-like protein; trans-membrane plant subgroup |
| -8.51435           | 4.46E-08        | <i>Cla019633</i> | Protein of unknown function DUF1264              |
| -8.45729           | 0               | <i>Cla013048</i> | Blue copper protein                              |
| -8.34065           | 0               | <i>Cla019870</i> | Kunitz trypsin inhibitor 4                       |
| -8.07614           | 0.000374        | <i>Cla008742</i> | Aquaporin 2                                      |
| -8.06636           | 0               | <i>Cla011719</i> | Phosphoglucosamine mutase                        |
| -7.98939           | 0.001618        | <i>Cla020292</i> | Rhodanese-like domain-containing protein         |
| -7.91976           | 0               | <i>Cla013631</i> | Unknown Protein                                  |
| -7.82536           | 0.001832        | <i>Cla004567</i> | Methionine s-methyltransferase                   |
| -7.61228           | 5.49E-09        | <i>Cla008813</i> | Glycine-rich protein-2                           |
| -7.56909           | 0               | <i>Cla020593</i> | Serine carboxypeptidase-like 13                  |
| -7.43321           | 3.13E-05        | <i>Cla013579</i> | Protein of unknown function DUF789               |
| -7.31318           | 0               | <i>Cla021554</i> | Proteinase inhibitor I-B                         |
| -6.72089           | 4.18E-13        | <i>Cla009952</i> | Serine carboxypeptidase-like 13                  |
| -6.38885           | 0               | <i>Cla022834</i> | Glucose-methanol-choline oxidoreductase          |

Supplementary Table S6. List of pathways that are altered in tetraploid compared to diploids (CLD1 and WM)

**CLT1\_vs\_CLD1**

| Classified pathways                                                         | List of genes                                                                                                                                                                                                                                                                                                                                                           |
|-----------------------------------------------------------------------------|-------------------------------------------------------------------------------------------------------------------------------------------------------------------------------------------------------------------------------------------------------------------------------------------------------------------------------------------------------------------------|
| Abscisic_acid_biosynthesis                                                  | Cla003134 Cla023114                                                                                                                                                                                                                                                                                                                                                     |
| Adenosyl.L.methionine_cycle_I                                               | Cla004096 Cla015190 Cla017148 Cla017324                                                                                                                                                                                                                                                                                                                                 |
| Aerobic_respiration_cytochrome_c                                            | Cla000034 Cla000840 Cla001181 Cla002352 Cla005369 Cla005925 Cla005926 Cla006136 Cla007631 Cla007728 Cla008664 Cla009926 Cla010909 Cla011643 Cla013134 Cla013368 Cla014035 Cla015141 Cla017191 Cla017414 Cla017692 Cla018400 Cla018505 Cla019532 Cla020888 Cla020955 Cla021355 Cla022111 Cla022635 Cla022868                                                             |
| Alpha.amylin_biosynthesis                                                   | Cla004749 Cla019849                                                                                                                                                                                                                                                                                                                                                     |
| Arginine_biosynthesis_IV                                                    | Cla002609 Cla002611 Cla012627 Cla019569                                                                                                                                                                                                                                                                                                                                 |
| Ascorbate_glutathione_cycle                                                 | Cla011751 Cla013224 Cla013927 Cla015833 Cla016538 Cla017711 Cla020113                                                                                                                                                                                                                                                                                                   |
| Calvin.Benson.Bassham_cycle                                                 | Cla001076 Cla001753 Cla002691 Cla003384 Cla003902 Cla003920 Cla007150 Cla012175 Cla013455 Cla016609 Cla017722 Cla018136 Cla018371 Cla018594 Cla020400 Cla020445 Cla021318 Cla023464                                                                                                                                                                                     |
| Cholesterol_biosynthesis_I                                                  | Cla001251 Cla018902 Cla020920 Cla022651                                                                                                                                                                                                                                                                                                                                 |
| Cholesterol_biosynthesis_II_via_24.25.dihydrolanosterol                     | Cla001251 Cla018902 Cla020920 Cla022651                                                                                                                                                                                                                                                                                                                                 |
| Dolichyl.diphosphooligosaccharide_biosynthesis                              | Cla008829 Cla023443                                                                                                                                                                                                                                                                                                                                                     |
| Fatty_acid_beta.oxidation_V_unsaturated._odd_number._di.isomerase.dependent | Cla000633 Cla002393 Cla004686 Cla010879                                                                                                                                                                                                                                                                                                                                 |
| Flavonoid_biosynthesis                                                      | Cla004708 Cla006682 Cla006818 Cla007458 Cla008896 Cla015296 Cla017799                                                                                                                                                                                                                                                                                                   |
| Gibberellin_biosynthesis_I_non_C.3._non_C.13_hydroxylation                  | Cla002362 Cla013892                                                                                                                                                                                                                                                                                                                                                     |
| Glucoside_biosynthesis                                                      | Cla013516 Cla014414 Cla016287                                                                                                                                                                                                                                                                                                                                           |
| Glucoside_degradation                                                       | Cla009226 Cla017417 Cla017418 Cla017499 Cla022015 Cla023406                                                                                                                                                                                                                                                                                                             |
| Glutathione.mediated_detoxification_II                                      | Cla005408 Cla005410 Cla007412 Cla007826 Cla011819 Cla014638 Cla014674 Cla018149 Cla018150 Cla018159 Cla018161 Cla018163 Cla018614 Cla021309 Cla021338 Cla021465 Cla022390                                                                                                                                                                                               |
| Glycolipid_biosynthesis                                                     | Cla008401 Cla016674                                                                                                                                                                                                                                                                                                                                                     |
| Heptadecane_biosynthesis                                                    | Cla006996 Cla021363 Cla021364                                                                                                                                                                                                                                                                                                                                           |
| Homogalacturonan_degradation                                                | Cla000006 Cla000060 Cla000802 Cla002569 Cla002954 Cla005855 Cla005856 Cla007803 Cla008440 Cla008598 Cla008599 Cla008601 Cla009218 Cla009288 Cla009870 Cla010077 Cla010310 Cla011144 Cla011256 Cla011376 Cla011585 Cla012554 Cla014466 Cla014927 Cla015081 Cla015103 Cla015379 Cla015505 Cla015663 Cla015665 Cla015729 Cla017515 Cla019426 Cla019978 Cla021325 Cla023049 |
| Homoserine_biosynthesis                                                     | Cla005922 Cla011076 Cla012443 Cla012444 Cla012768                                                                                                                                                                                                                                                                                                                       |

|                                                            |                                                                                                                                                                                                                                                                     |
|------------------------------------------------------------|---------------------------------------------------------------------------------------------------------------------------------------------------------------------------------------------------------------------------------------------------------------------|
| loi.diquinones_biosynthesis                                | Cla019479 Cla019481 Cla019482 Cla019483                                                                                                                                                                                                                             |
| Isoleucine_biosynthesis_I_from_threonine                   | Cla014059 Cla018353 Cla022656                                                                                                                                                                                                                                       |
| L.ascorbate_degradation_V                                  | Cla013927 Cla015833 Cla016538                                                                                                                                                                                                                                       |
| L.dopachrome_biosynthesis                                  | Cla019479 Cla019481 Cla019482 Cla019483                                                                                                                                                                                                                             |
| Leucine_degradation_I                                      | Cla014059 Cla014787 Cla016017 Cla022656                                                                                                                                                                                                                             |
| Methionine_salvage_I_bacteria_and_plants                   | Cla007532 Cla015852 Cla021593                                                                                                                                                                                                                                       |
| NADNADH_phosphorylation_and_dephosphorylation              | Cla000034 Cla002352 Cla002446 Cla006136 Cla007631 Cla007728 Cla009926 Cla011643 Cla013134 Cla013368 Cla014035 Cla017191 Cla017414 Cla018505 Cla019532 Cla020888 Cla022635                                                                                           |
| Oxygenic_photosynthesis                                    | Cla001076 Cla001753 Cla002691 Cla003384 Cla003902 Cla003920 Cla007150 Cla008898 Cla012175 Cla013455 Cla015978 Cla016609 Cla017722 Cla018136 Cla018371 Cla018594 Cla020400 Cla020445 Cla021318 Cla023464                                                             |
| Proline_degradation                                        | Cla008345 Cla016474                                                                                                                                                                                                                                                 |
| Pyridine_nucleotide_cycling_plants                         | Cla004412 Cla005242 Cla011637 Cla012921 Cla015842 Cla020230 Cla020306                                                                                                                                                                                               |
| Pyrimidine_ribonucleotides_ide_novoi_biosynthesis          | Cla001144 Cla002593 Cla004257 Cla005332 Cla006509 Cla008326 Cla008640 Cla009176 Cla009591 Cla012430 Cla012806 Cla012882 Cla012883 Cla013319 Cla013360 Cla013669 Cla015409 Cla015561 Cla018438 Cla019065 Cla019856 Cla020705 Cla021068 Cla021290 Cla021811 Cla023188 |
| Pyrimidine_ribonucleotides_interconversion                 | Cla001144 Cla002593 Cla004257 Cla006509 Cla008326 Cla008640 Cla009176 Cla009591 Cla012430 Cla012806 Cla012882 Cla012883 Cla013319 Cla013360 Cla013669 Cla015409 Cla015561 Cla019065 Cla019856 Cla020705 Cla021068 Cla021290 Cla021811 Cla023188                     |
| Salvage_pathways_of_pyrimidine_ribonucleotides             | Cla002593 Cla007102 Cla011217 Cla012806 Cla021068                                                                                                                                                                                                                   |
| Soybean_saponin_I_biosynthesis                             | Cla004749 Cla019849                                                                                                                                                                                                                                                 |
| Sucrose_degradation_I                                      | Cla002444 Cla007015 Cla015574 Cla017674                                                                                                                                                                                                                             |
| Sulfite_oxidation_III                                      | Cla007535 Cla014443 Cla021584                                                                                                                                                                                                                                       |
| Superpathway_of_leucine_valine_and_isoleucine_biosynthesis | Cla013165 Cla014059 Cla018353 Cla022656                                                                                                                                                                                                                             |
| Tetrapyrrole_biosynthesis_I                                | Cla005137 Cla011998 Cla018703 Cla022180 Cla022543                                                                                                                                                                                                                   |
| Thiosulfate_disproportionation_III_rhodanese               | Cla013049 Cla014327                                                                                                                                                                                                                                                 |
| Uridine.5.phosphate_biosynthesis                           | Cla005332 Cla018438                                                                                                                                                                                                                                                 |
| Valine_biosynthesis                                        | Cla014059 Cla022656                                                                                                                                                                                                                                                 |
| Very_long_chain_fatty_acid_biosynthesis                    | Cla006236 Cla008263 Cla012291 Cla013264 Cla021116 Cla021577                                                                                                                                                                                                         |
| Vitamin_E_biosynthesis                                     | Cla006029 Cla006807 Cla023238                                                                                                                                                                                                                                       |
| Wax_esters_biosynthesis_I                                  | Cla008654 Cla011600 Cla016291 Cla016293                                                                                                                                                                                                                             |
| Xyloglucan_biosynthesis                                    | Cla019094 Cla019095                                                                                                                                                                                                                                                 |

## CLT1\_vs\_WM

| Classified pathways                            | List of genes                                                                                                                                                                                                                                                                                    |
|------------------------------------------------|--------------------------------------------------------------------------------------------------------------------------------------------------------------------------------------------------------------------------------------------------------------------------------------------------|
| Aerobic_respiration_cytochrome_c               | Cla001604 Cla002352 Cla005369 Cla006136 Cla006811 Cla007631 Cla008663 Cla008664<br>Cla010909 Cla011643 Cla011790 Cla012327 Cla012694 Cla013134 Cla013368 Cla014035<br>Cla015141 Cla015924 Cla016610 Cla016936 Cla017191 Cla018400 Cla018505 Cla019456<br>Cla020888 Cla020955 Cla022111 Cla022868 |
| Arginine_biosynthesis_II_acetyl_cycle          | Cla002611 Cla022154 Cla022915                                                                                                                                                                                                                                                                    |
| Chlorophyllide_iai_biosynthesis_I              | Cla002769 Cla005862 Cla006432 Cla006520 Cla009670 Cla012169 Cla019253 Cla023399                                                                                                                                                                                                                  |
| Flavonoid_biosynthesis                         | Cla002602 Cla002689 Cla006682 Cla006818 Cla007400 Cla008896 Cla015296 Cla015298<br>Cla017226 Cla017799 Cla018820 Cla022860                                                                                                                                                                       |
| GDP.mannose_biosynthesis                       | Cla003612 Cla006550 Cla016948 Cla022170                                                                                                                                                                                                                                                          |
| Gluconeogenesis_I                              | Cla002259 Cla003902 Cla006486 Cla006920 Cla006921 Cla007150 Cla007587 Cla011268<br>Cla012154 Cla013455 Cla013611 Cla014068 Cla015968 Cla017722 Cla018136 Cla018371<br>Cla019014 Cla020526 Cla021103 Cla022170 Cla023334 Cla023464                                                                |
| Glucose_and_glucose.1.phosphate_degradation    | Cla002361 Cla011719                                                                                                                                                                                                                                                                              |
| Glutathione.mediated_detoxification_II         | Cla005408 Cla005410 Cla007412 Cla007826 Cla014674 Cla018149 Cla018151 Cla018159<br>Cla018160 Cla018614 Cla018615 Cla018942 Cla021338 Cla021463 Cla021465 Cla022390                                                                                                                               |
| ltransi.cinnamoyl.CoA_biosynthesis             | Cla008727 Cla012779 Cla013761 Cla018297 Cla018302                                                                                                                                                                                                                                                |
| Jasmonic_acid_biosynthesis                     | Cla006236 Cla007649 Cla008520 Cla009118 Cla009402 Cla011168 Cla011742 Cla011979<br>Cla012872 Cla015969 Cla016453 Cla017066 Cla017068 Cla019897 Cla019899 Cla019900<br>Cla019905 Cla019907 Cla021116 Cla021577 Cla021777                                                                          |
| L.ascorbate_degradation_V                      | Cla013927 Cla016538                                                                                                                                                                                                                                                                              |
| Leucine_degradation_I                          | Cla008590 Cla014787 Cla016017                                                                                                                                                                                                                                                                    |
| Methylerythritol_phosphate_pathway             | Cla007929 Cla009346 Cla011088 Cla014654 Cla022299                                                                                                                                                                                                                                                |
| Oleate_beta.oxidation                          | Cla004547 Cla016773 Cla021543 Cla021546                                                                                                                                                                                                                                                          |
| Oxygenic_photosynthesis                        | Cla001076 Cla001753 Cla002691 Cla003384 Cla003902 Cla003920 Cla004700 Cla006515<br>Cla007124 Cla007150 Cla012175 Cla013455 Cla013611 Cla015978 Cla017722 Cla018136<br>Cla018371 Cla019816 Cla020400 Cla020445 Cla021318 Cla023464                                                                |
| Phenylpropanoid_biosynthesis                   | Cla000214 Cla002602 Cla002689 Cla004553 Cla006818 Cla007400 Cla008122 Cla010234<br>Cla010408 Cla015296 Cla015298 Cla015324 Cla017226 Cla017799 Cla018764 Cla018820<br>Cla022860                                                                                                                  |
| Phenylpropanoid_biosynthesis_initial_reactions | Cla005785 Cla008727 Cla012779 Cla013420 Cla013761 Cla018297 Cla018302                                                                                                                                                                                                                            |
| Purine_nucleotides_ide_novoi_biosynthesis_II   | Cla005483 Cla006493 Cla008058 Cla011995 Cla011996 Cla017506 Cla022128                                                                                                                                                                                                                            |
| Pyridine_nucleotide_cycling_plants             | Cla005242 Cla012921 Cla012953 Cla014101 Cla020306                                                                                                                                                                                                                                                |
| Salvage_pathways_of_pyrimidine_ribonucleotides | Cla011217 Cla012806 Cla021068                                                                                                                                                                                                                                                                    |
| Starch_degradation_I                           | Cla002226 Cla002291 Cla002361 Cla005462 Cla011719 Cla016310 Cla020126 Cla020676                                                                                                                                                                                                                  |

|                                                 |                                                                                              |
|-------------------------------------------------|----------------------------------------------------------------------------------------------|
|                                                 | Cla021470                                                                                    |
| Suberin_biosynthesis                            | Cla004452 Cla005785 Cla008727 Cla012779 Cla013420 Cla013761 Cla015633 Cla018297<br>Cla018302 |
| Sulfite_oxidation_III                           | Cla014443 Cla021584                                                                          |
| Superoxide_radicals_degradation                 | Cla001158 Cla008101 Cla008698 Cla009820 Cla010691 Cla011299 Cla017817 Cla023447              |
| Thiosulfate_disproportionation_III_rhodanese    | Cla013049 Cla014295 Cla014327 Cla020292                                                      |
| Threonine_biosynthesis_from_homoserine          | Cla011183 Cla015737                                                                          |
| Trehalose_biosynthesis_I                        | Cla002241 Cla008123 Cla019181 Cla022086                                                      |
| Trehalose_biosynthesis_II                       | Cla002241 Cla008123 Cla019181 Cla022086                                                      |
| Trehalose_biosynthesis_III                      | Cla002241 Cla008123 Cla019181 Cla022086                                                      |
| Triacylglycerol_degradation                     | Cla005001 Cla020664 Cla020665 Cla021076                                                      |
| Tyrosine_biosynthesis_II                        | Cla016538 Cla016672                                                                          |
| Tyrosine_biosynthesis_III                       | Cla016538 Cla016672                                                                          |
| UDP.D.xylose_and_UDP.D.glucuronate_biosynthesis | Cla008682 Cla017409                                                                          |
| Urea_cycle                                      | Cla002611 Cla006970 Cla022154 Cla022915                                                      |
| Valine_degradation_I                            | Cla000753 Cla004547 Cla014095 Cla016773                                                      |
| Wax_esters_biosynthesis_II                      | Cla008963 Cla016021                                                                          |

Supplementary Table S7. Primers used in this study.

| Gene ID                 | Primers     | Sequence (5'→3')          |
|-------------------------|-------------|---------------------------|
| Semiquantitative RT-PCR |             |                           |
| <i>Cla015387</i>        | WMAS-418-1F | CAATCTCTTCTTCAGCCTTTTTCAC |
|                         | WMAS-418-1R | GCTGTCAGACTATCAAGATC      |
|                         | WMAS-418-2F | GATGATGGGAATGAGCTTACG     |
|                         | WMAS-418-2R | CTTGTTACGACCTTCATCC       |
|                         | WMAS-418-3F | GAGGCTTACTTCTCCAACATG     |
|                         | WMAS-418-3R | CTTGCAACTTGGGGAAATGG      |
|                         | WMAS-418-4R | GTGAAGAATGAAACCACATAACG   |
| <i>Cla022427</i>        | WMAS-951-1F | GCCATCCTCTCCAAAGCTCTC     |
|                         | WMAS-951-1R | GGTCATGGCGGCGTAGCAGG      |
|                         | WMAS-951-2R | GTGGTCAACGGTCAACGGCA      |
| <i>Cla013951</i>        | WMAS-970-1F | CAGTGAAGAGATACCCAGCG      |
|                         | WMAS-970-1R | CAAACGGATCATTAAGGACCG     |
|                         | WMAS-970-2F | CTCGCCGAGAAGATTCATCT      |
|                         | WMAS-970-2R | AAGTGCGATGATAATGGCTCC     |
|                         | WMAS-970-3F | CGTGTATCGAAACACTATTGC     |
| <i>Cla010408</i>        | WMAS-875-1F | GATTTTCAGTGTACTCGGCGA     |
|                         | WMAS-875-1R | GACCAGCAGGATCAATGGAG      |
|                         | WMAS-875-2F | GGCGTCGTAATTCGTTTCAGA     |
|                         | WMAS-875-2R | CCAATCTGATGCGATAAAGAC     |
|                         | WMAS-875-3R | ATCACATTCTCAGTGGTCCT      |
|                         | WMAS-875-4R | CAATTTGGTCACATCCACG       |
| <i>Cla019245</i>        | WMAS-927-1F | CCTCCTAATCCACCCTCTTAC     |
|                         | WMAS-927-1R | GGCAAGGTCAATACGTCACT      |
|                         | WMAS-927-2R | TGCCCGTATCCAGAGTAATC      |
|                         | WMAS-927-3R | CTACCCGGCACGGATTCTATC     |
| <i>Cla001640</i>        | WMAS-731-1F | GCTTCAACCAAGAGGCTCCA      |
|                         | WMAS-731-1R | GAAGAATGACAAGTGGTTGGTC    |
|                         | WMAS-731-2R | CTAGTCGAGGCAGGTCTAAA      |
|                         | WMAS-731-3R | CCATTGCGAAGCCACCACA       |
| <i>Cla004401</i>        | WMAS-432-1F | CAGTTGTTGCTCCTCCAGAT      |
|                         | WMAS-432-1R | CACAGCTATTACACAAGCCG      |
|                         | WMAS-432-2F | AACAGTTGTTGCTCCTCCAG      |
|                         | WMAS-432-2R | GCTACAATGGTCTATCTAAAG     |
| <i>Cla012247</i>        | WMAS-874-1F | GTGAGATAGGAGTTTGAAACTAG   |
|                         | WMAS-874-1R | GAGGATACTAAATTGAAGGGC     |
|                         | WMAS-874-2F | AGATGCTTTAGGAGTGGCAG      |
|                         | WMAS-874-2R | GCATTTACCTCCCACATTG       |
| <i>Cla011845</i>        | WMAS-012-1F | CAGTCGTGTGACCCATGTTG      |

|                  |             |                           |
|------------------|-------------|---------------------------|
|                  | WMAS-012-1R | CAGAAGCCCAAAGGGACACA      |
|                  | WMAS-012-2F | CGAGTCCAGTTGATTTACAGC     |
|                  | WMAS-012-2R | GATACCGAGACAAGCACTGA      |
|                  | WMAS-012-3R | CTGAGCAGTTACATCAGCCTG     |
| <i>Cla015518</i> | WMAS-932-1F | GTCTGAGGATCTGCATCCAG      |
|                  | WMAS-932-1R | TAAGGCAACAGTCCAGATGG      |
|                  | WMAS-932-2F | ACTCGTGGAATCCGAAACATC     |
|                  | WMAS-932-2R | GACTAACATCAGTTCCAGAC      |
| <i>Cla012768</i> | WMAS-092-1F | TGCTACCCTGAGAGGCTGGG      |
|                  | WMAS-092-1R | GTCTTGATTGGAAGTAGCG       |
|                  | WMAS-092-2F | GGAGAATGACCCGTGCGAAT      |
|                  | WMAS-092-2R | CAATCTGCGAGCATGACATTC     |
| <i>Cla001006</i> | WMAS-582-1F | TGACAACCACCTGCCCTCAC      |
|                  | WMAS-582-1R | GGATTACTAAGGGCTCCTTGG     |
| <i>Cla006689</i> | WMAS-633-1F | GGTGGCTGGTCAAACATGCTA     |
|                  | WMAS-633-1R | CTTTCAGTCTTCCTCGTCGC      |
| <i>Cla002053</i> | WMAS-151-1F | GAAGCTACGTCGTGGTCAAG      |
|                  | WMAS-151-1R | ATGCCTCAGGATCAACCACC      |
|                  | WMAS-151-2R | GAGGTTCTTCTAGCCCGTGG      |
| <i>Cla005769</i> | WMAS-907-1F | GATCGAGAAGACAGAGTGAG      |
|                  | WMAS-907-1R | GTTTAGCCAATAGAGATAGAGATAC |
|                  | WMAS-907-2F | GCCTTCCTACTCCGTTTAGC      |
|                  | WMAS-907-2R | AACAGAAGCACAAGCACCAA      |
| <i>Cla009531</i> | WMAS-444-1F | CAGCCAGTTCAGTCTTCAAG      |
|                  | WMAS-444-1R | GAGCGGCGATTTGTTGCTGA      |
|                  | WMAS-444-2R | CTCTCCAGGAACCCATTTCTC     |
| <i>Cla008232</i> | WMAS-362-1F | CTCCAACCTTCAATCATCAC      |
|                  | WMAS-362-1R | ATGCTGAACAGCCAAGTGCC      |
|                  | WMAS-362-2F | TGGGTCTCTGATTGGCTAC       |
|                  | WMAS-362-2R | TGCAAGCAAGATGAGGACTGG     |
| <i>Cla012250</i> | WMAS-556-1F | CTATCTCACATACATCTTCTCC    |
|                  | WMAS-556-1R | CTCACACTGTGATAGTATACG     |
|                  | WMAS-556-2F | GAAGAAGCTAAGTTGGACGGT     |
|                  | WMAS-556-2R | CTGTCTCGTCAAACCTGGTCTG    |
| <i>Cla008071</i> | WMAS-401-1F | CATTTGAAGAGTGACAAAATTC    |
|                  | WMAS-401-1R | CAAATCCACAACAGTATGCAAAC   |
|                  | WMAS-401-2R | AGTGAAATGACCAACCTGAC      |
|                  | WMAS-401-3R | TCTACTGCAATAAAGCTACATC    |
| <i>Cla012755</i> | WMAS-906-1F | GTCCGTATCCATGGAGATTC      |
|                  | WMAS-906-1R | TATCACAACAGAACGAGACC      |
|                  | WMAS-906-2R | CAAACCATCTTCCAGTTCAAG     |



|                                                 |                   |                            |
|-------------------------------------------------|-------------------|----------------------------|
|                                                 | WMAS-906-3R       | CACTTGGTCAACCAGTAGATG      |
| <i>Cla008582</i>                                | WMAS-921-1F       | AACTACGGTGGCGATAAGCAT      |
|                                                 | WMAS-921-1R       | TTCCTCACCCATCCAAGCAT       |
|                                                 | WMAS-921-2F       | GTGACATGTGTCCAGGTAC        |
|                                                 | WMAS-921-2R       | GGAGAAAAGGTAAAGGGTAG       |
| <i>Cla013509</i>                                | WMAS-233-1F       | CTCTATGGAGCTTCGTCTCCAG     |
|                                                 | WMAS-233-1R       | TCTTCACAATCTCTGGAGAGC      |
| <i>Cla004730</i>                                | WM <i>EF1</i> -2F | TTGCTCTGTGGAAGTTCGAGA      |
|                                                 | WM <i>EF1</i> -R  | TGGGAAGTGAAATTGGCAGC       |
| Quantitative RT-PCR (for cumulative expression) |                   |                            |
| <i>Cla012250</i>                                | AS-556-QP-1F      | CGTGCGTGTGAATTTAATGACATAA  |
|                                                 | AS-556-QP-1R      | CATATGAATCCATCACATGAGTGTTG |
| <i>Cla015387</i>                                | AS-418-QP-1F      | ACATGGTGTGGAGACAATGAAGT    |
|                                                 | AS-418-QP-1R      | TGCTGTGGTAGGTCCATGGA       |
| <i>Cla022427</i>                                | AS-951-QP-1F      | TGTGCTGGGAGGTGCAAGT        |
|                                                 | AS-951-QP-1R      | GCACGTCCCACACGCTCTAT       |
| <i>Cla013951</i>                                | AS-970-QP-1F      | CGCCGCAGCCAATCAG           |
|                                                 | AS-970-QP-1R      | ACACGCAGCCCAGAAGGAT        |
| <i>Cla010408</i>                                | AS-875-QP-1F      | CGGCGTTCAGAGGAGGAA         |
|                                                 | AS-875-QP-1R      | CCATCGGCTTAGATTTCAAGCT     |
| <i>Cla008071</i>                                | AS-401-QP-1F      | ACCCTCGTTCCCCCTTCTT        |
|                                                 | AS-401-QP-1R      | CCCATCGGCGCTTCTCTT         |
| <i>Cla012247</i>                                | AS-874-QP-1F      | AGATGCTTTAGGAGTGGCAGAAGT   |
|                                                 | AS-874-QP-1R      | CAAGTCCCCCTCCTTAAAATCA     |
| <i>Cla005769</i>                                | AS-907-QP-1F      | TTGCATGGCAGATAATAACCAA     |
|                                                 | AS-907-QP-1R      | TCCATGCCCATCTTTTAGACATAG   |
| <i>Cla008232</i>                                | AS-362-QP-1F      | GGTTGGTGTCTTCTGGCACTTG     |
|                                                 | AS-362-QP-1R      | AGTCAGCCGTGCAGATTAAAGG     |
| <i>Cla019245</i>                                | AS-927-QP-1F      | CCCCACCGCGAAAATGT          |
|                                                 | AS-927-QP-1R      | CGACAATCTCATTGCCTTTACG     |
| <i>Cla008582</i>                                | AS-921-QP-1F      | CCATCTGTGCTCCATTTTGCT      |
|                                                 | AS-921-QP-1R      | CAGAGAGGTTGGACGTGTTTGA     |
| <i>Cla011845</i>                                | AS-012-QP-1F      | GCCATCCATGCTAGCCTTTG       |
|                                                 | AS-012-QP-1R      | TCAATAAATGCCAATGCAGCTT     |
| <i>Cla015518</i>                                | AS-932-QP-1F      | CTGATTCCCCAAAATTGATCTG     |
|                                                 | AS-932-QP-1R      | TCTCATAAGCCCGCATCAAAT      |
| <i>Cla001640</i>                                | AS-731-QP-1F      | GGCTGGAAGGTTGAAAGTTAACC    |
|                                                 | AS-731-QP-1R      | CACCGCCATTGCAATCAAT        |
| <i>Cla012755</i>                                | AS-906-QP-1F      | AACCTTGAATCCTGTCGTTTGAA    |
|                                                 | AS-906-QP-1R      | TCTTCGAATCACACACAACGAAA    |
| <i>Cla009531</i>                                | AS-444-QP-1F      | TGGCGTAACAAATGCTGAAAGTA    |

|                                            |              |                           |
|--------------------------------------------|--------------|---------------------------|
|                                            | AS-444-QP-1R | CCGTTGGAGGGAAGTTTGTTAG    |
| <i>Cla002053</i>                           | AS-151-QP-1F | CAGCGAGCGTGCCATGT         |
|                                            | AS-151-QP-1R | CACCATCGCAAGCATCACA       |
| <i>Cla012768</i>                           | AS-092-QP-1F | TGTGGAGGACAAAAGCTGAGAT    |
|                                            | AS-092-QP-1R | TCAGGGAGCTGGCTCTCATC      |
| <i>Cla004401</i>                           | AS-432-QP-1F | AAGAAAAAATGACATGCAGGTGAA  |
|                                            | AS-432-QP-1R | CCAACAAAAGCCCCTCCAT       |
| <i>Cla013509</i>                           | AS-233-QP-1F | TCTGGATTGTGGAGTTCTTTGCT   |
|                                            | AS-233-QP-1R | CCATTCTGGAGCCAATCGTT      |
| <i>Cla001006</i>                           | AS-582-QP-1F | GGAGCCCTTAGTAATCCCAGTTG   |
|                                            | AS-582-QP-1R | AACCGAGATGGATGGTCTTGA     |
| <i>Cla006689</i>                           | AS-633-QP-1F | GAGGAGAATAAACTGGCTGACTTG  |
|                                            | AS-633-QP-1R | CCTTAAGTGCTTTTGCCACATCT   |
| Quantitative RT-PCR (for spliced products) |              |                           |
| <i>Cla008071</i>                           | 401-WMQP-1F  | GGAAGTAACCGCCGACGAA       |
|                                            | 401-WMQP-1R  | AACTGTGCGGAATTCCACTTCT    |
| <i>Cla009531</i>                           | 444-WMQP-1F  | AGGAGTCGGCAACCAATATGA     |
|                                            | 444-WMQP-1R  | TGTTGAACCGTAGCCAGAGAAA    |
| <i>Cla012250</i>                           | 556-WMQP-1F  | GGTGACAGGAAACGATGGAGAA    |
|                                            | 556-WMQP-1R  | GAAGCAGTCAAGTCTGCCATAATTT |
| <i>Cla010408</i>                           | 875-WMQP-1F  | ATTTGCTTTAGAGCTACGATTGCTT |
|                                            | 875-WMQP-1R  | AAGGACCAGATGGAGGTTGAAA    |
| <i>Cla001640</i>                           | 731-WMQP-1F  | CCCGCCACGTGTCATTTT        |
|                                            | 731-WMQP-1R  | AGGGAAGTGGAGTGTCAAGCTT    |
| <i>Cla005769</i>                           | 907-WMQP-1F  | GCTTTTCCCATGTTGTTTCA      |
|                                            | 907-WMQP-1R  | CACAAGCACCAAAGGCAACT      |
| <i>Cla015518</i>                           | 932-WMQP-1F  | GCTTTGACCTGCTGAAGAGGAT    |
|                                            | 932-WMQP-1R  | ACAAATTTAAGCCCACCCGTTA    |
| <i>Cla019245</i>                           | 927-WMQP-1F  | TCCTTTATGGTCAATCTGTTGGAA  |
|                                            | 927-WMQP-1R  | GGGCAAACGTGCAGCAA         |
| <i>Cla013951</i>                           | 970-WMQP-1F  | CCTGTATTTGTGACGGCTTTCA    |
|                                            | 970-WMQP-1R  | CGGCGAGAACAATAGAGGAGAT    |
